# Supplementary material for: Spinal cord injury impairs cardiac function due to impaired bulbospinal sympathetic control
Source: PubMed Central journal article supplement (PMC8927412; doi:10.1038/s41467-022-29066-1), 2022-03-16
Supplement: 41467_2022_29066_MOESM1_ESM.pdf [file 41467_2022_29066_MOESM1_ESM.pdf]

**Spinal cord injury impairs cardiac function due to impaired bulbospinal sympathetic control**

Fossey et al.

**Supplementary Table 1.** Participant characteristics of non-injured, sub-acute and chronic injured human groups

|                       | P VALUE           | GROUP       |             |                 |
|-----------------------|-------------------|-------------|-------------|-----------------|
|                       |                   | NON-INJURED | SUB-ACUTE   | CHRONIC         |
| Age (years)           | p=0.674           | 39.6 (13.8) | 42.7 (12.1) | 41.2 (10.4)     |
| Height (cm)           | p=0.826           | 174 (8)     | 175 (11)    | 175 (10)        |
| Weight (kg)           | p=0.204           | 79.5 (12.2) | 82.1 (15.4) | 74.8 (12.3)     |
| BSA (m <sup>2</sup> ) | p=0.141           | 1.94 (0.18) | 1.98 (0.21) | 1.90 (0.19)     |
| Male/Female (% Male)  | p=0.828           | 10/4 (71%)  | 14/9 (61%)  | 15/7 (68%)      |
| AIS A/B (%A)          | p=0.139           | -           | 9/14 (39%)  | 14/8 (64%)      |
| TSI (days)            | <b>p&lt;0.001</b> | -           | 95.6 (25.6) | 5540.2 (3392.8) |

Continuous values are means (SD). Non-injured ( $n = 14$ ); Sub-acute SCI ( $n = 23$ ): C3 ( $n = 1$ ), C4 ( $n = 8$ ), C5 ( $n = 7$ ), C6 ( $n = 4$ ), C7 ( $n = 1$ ), C8 ( $n = 2$ ); Chronic SCI ( $n = 22$ ): C4 ( $n = 5$ ), C5 ( $n = 8$ ), C6 ( $n = 7$ ), C7 ( $n = 2$ ). Outliers were not removed prior to analysis as individuals were matched. Continuous variables were analyzed using either a one-way ANOVA and Tukey HSD post-hoc test (or Kruskal Wallis with post-hoc test, if non-parametric) or a Mann-Whitney U t-test for TSI (non-parametric). The categorical variables of sex and American Spinal Injury Association impairment scale (AIS) were analyzed using a Fisher's exact test. A, complete SCI; B, incomplete SCI; BSA, body surface area; TSI, time since injury. Bolded  $p$  values are significant,  $p < 0.05$ .

**Supplementary Table 2.** Temporal effects of SHAM and T3-SCI surgeries on pressure-volume data, hemodynamics and plasma norepinephrine in rodents

|                                       | LR                | GROUP        |                 |                 |                 |                 |                 |
|---------------------------------------|-------------------|--------------|-----------------|-----------------|-----------------|-----------------|-----------------|
|                                       |                   | SHAM         | 1 d             | 3 d             | 5 d             | 7 d             | 8 w             |
| LV load-dependent systolic measures   |                   |              |                 |                 |                 |                 |                 |
| P <sub>max</sub> (mmHg)               | <b>p&lt;0.001</b> | 118.4 (3.8)  | 91.6 (9.6) ***  | 89.6 (13.0) *** | 85.4 (8.5) ***  | 92.0 (5.8) ***  | 97.1 (8.5) ***  |
| P <sub>es</sub> (mmHg)                | <b>p=0.014</b>    | 88.7 (8.5)   | 72.9 (9.5) *    | 76.2 (15.0)     | 66.8 (7.2) **   | 68.6 (16.5) **  | 80.5 (7.8)      |
| P <sub>dev</sub> (mmHg)               | <b>p&lt;0.001</b> | 119.4 (4.6)  | 91.3 (5.8) ***  | 91.5 (14.3) *** | 87.6 (8.4) ***  | 91.2 (3.4) ***  | 95.2 (8.1) ***  |
| dP/dt <sub>max</sub> (mmHg/s)         | <b>p&lt;0.001</b> | 8383 (563)   | 5475 (846) ***  | 5240 (1825) *** | 4935 (1156) *** | 5765 (1178) *** | 5597 (761) ***  |
| SW (mmHg.mL)                          | <b>p&lt;0.001</b> | 20.4 (2.1)   | 18.6 (4.0)      | 14.4 (4.6) **   | 13.2 (3.0) **   | 14.4 (2.7) **   | 10.4 (4.7) ***  |
| E <sub>a</sub> (mmHg/μL)              | <b>p=0.004</b>    | 0.43 (0.03)  | 0.32 (0.06)     | 0.45 (0.17)     | 0.39 (0.13)     | 0.36 (0.12)     | 0.69 (0.31)     |
| LV load-independent systolic measures |                   |              |                 |                 |                 |                 |                 |
| E <sub>es</sub> (mmHg/μL)             | <b>p&lt;0.001</b> | 2.81 (0.40)  | 0.85 (0.29) *** | 1.29 (0.55) *** | 1.10 (0.41) *** | 1.10 (0.38) *** | 1.50 (0.49) *** |
| E <sub>a</sub> /E <sub>es</sub>       | <b>p=0.020</b>    | 0.16 (0.02)  | 0.36 (0.15) **  | 0.45 (0.38) **  | 0.36 (0.09) **  | 0.36 (0.16) **  | 0.39 (0.23) **  |
| PRSW (mmHg)                           | p=0.484           | 121.1 (17.1) | 121.4 (42.2)    | 121.1 (22.9)    | 106.4 (22.4)    | 141.3 (41.4)    | 138.6 (35.6)    |
| LV load-dependent diastolic measures  |                   |              |                 |                 |                 |                 |                 |
| P <sub>ed</sub> (mmHg)                | p=0.620           | 4.49 (3.57)  | 5.03 (9.88)     | 2.12 (3.55)     | 1.47 (2.44)     | 3.19 (6.45)     | 3.68 (4.65)     |
| -dP/dt <sub>min</sub> (mmHg/s)        | <b>p&lt;0.001</b> | -4957 (239)  | -3217 (159) *** | -3008 (678) *** | -2750 (700) *** | -3514 (783) *** | -3190 (541) *** |
| tau (ms)                              | p=0.268           | 7.58 (0.85)  | 13.01 (7.29)    | 12.56 (5.77)    | 9.57 (1.12)     | 10.85 (3.95)    | 13.21 (6.85)    |
| RC hemodynamic measures               |                   |              |                 |                 |                 |                 |                 |
| MAP (mmHg)                            | <b>p&lt;0.001</b> | 85.3 (9.9)   | 75.1 (7.0)      | 74.8 (11.7)     | 60.1 (7.2) ***  | 67.2 (7.4) **   | 69.2 (10.2) **  |
| SBP (mmHg)                            | <b>p&lt;0.001</b> | 115.2 (7.9)  | 91.9 (3.9) ***  | 88.8 (11.1) *** | 76.3 (8.6) ***  | 85.9 (5.5) ***  | 91.6 (8.2) ***  |
| DBP (mmHg)                            | p=0.055           | 62.4 (10.3)  | 61.8 (7.3)      | 61.2 (10.1)     | 48.3 (6.1)      | 54.1 (6.7)      | 54.6 (11.4)     |
| HR (bpm)                              | <b>p=0.014</b>    | 374 (29)     | 278 (40) **     | 276 (101) **    | 271 (59) **     | 334 (63)        | 276 (36) **     |
| SVR (mmHg/mL)                         | p=0.123           | 1.11 (0.13)  | 1.22 (0.39)     | 1.69 (0.91)     | 1.46 (0.69)     | 1.16 (0.44)     | 1.89 (0.57)     |
| Sympathetic activity measure          |                   |              |                 |                 |                 |                 |                 |
| Plasma NE (pg/mL)                     | <b>p=0.002</b>    | 2618 (312)   | 1145 (452) ***  | -               | -               | 1363 (693) **   | 1767 (470) *    |

Values are means (SD). For pressure-volume and hemodynamic data: SHAM ( $n = 6$ ); 1 d: 1 day T3-SCI ( $n = 6-7$ ); 3 d: 3 days T3-SCI ( $n = 5-6$ ); 5 d: 5 days T3-SCI ( $n = 5-6$ ); 7 d: 7 days T3-SCI ( $n = 6$ ); 8 w: 8 weeks T3-SCI ( $n = 8-9$ ). For NE data: SHAM ( $n = 4$ ); 1 d ( $n = 7$ ); 7 d ( $n = 6$ ); 8 w ( $n = 5$ ). Group differences for linear regression (LR) with coefficient (group mean differences) p-values are shown as symbols (SHAM vs. T3-SCI timepoints): \* $p < 0.05$ , \*\* $p < 0.01$  and \*\*\* $p < 0.001$ . If data were non-parametric, a Box-Cox transformation or a logarithmic transformation was performed. DBP, diastolic blood pressure; dP/dt<sub>max</sub>, maximal rate of systolic pressure increment; -dP/dt<sub>min</sub>, maximal rate of diastolic pressure decrement; E<sub>a</sub>, arterial elastance; E<sub>a</sub>/E<sub>es</sub>, ventricular vascular coupling

ratio;  $E_{es}$ , end-systolic elastance (end-systolic pressure-volume relationship); HR, heart rate; LV, left ventricle; MAP, mean arterial pressure; NE, norepinephrine;  $P_{dev}$ , developed pressure;  $P_{ed}$ , end-diastolic pressure;  $P_{es}$ , end-systolic pressure;  $P_{max}$ , maximum pressure; PRSW, preload recruitable stroke work; RC, right-carotid; SBP, systolic blood pressure; SVR, systemic vascular resistance; SW, stroke work; tau, diastolic time constant. Bolded  $p$  values are significant,  $p < 0.05$ .

**Supplementary Table 3.** Temporal effects of SHAM and T3-SCI surgeries on gene expression, anatomical and cardiomyocyte dimensional data in rodents

|                                                | GROUP             |               |                 |                |                |               |               |                 |
|------------------------------------------------|-------------------|---------------|-----------------|----------------|----------------|---------------|---------------|-----------------|
|                                                | LR                | SHAM          | 12 h            | 1 d            | 3 d            | 5 d           | 7 d           | 8 w             |
| RNA fold changes of UPS and Autophagy markers  |                   |               |                 |                |                |               |               |                 |
| <i>MAFbx</i> (UPS)                             | <b>p&lt;0.001</b> | 1.06 (0.34)   | 3.57 (1.07) *** | 2.33 (1.13) ** | 2.26 (0.42) ** | 1.93 (0.49) * | 1.73 (0.48) * | -               |
| <i>MuRF1</i> (UPS)                             | p=0.271           | 1.02 (0.22)   | 1.38 (0.23)     | 1.38 (0.52)    | 1.49 (0.38)    | 1.66 (0.62)   | 1.03 (0.74)   | -               |
| <i>BECN1</i> (Autophagy)                       | p=0.982           | 1.01 (0.13)   | 1.07 (0.33)     | 1.21 (0.54)    | 1.05 (0.23)    | 1.04 (0.31)   | 1.13 (0.24)   | -               |
| <i>ATG7</i> (Autophagy)                        | p=0.355           | 1.03 (0.28)   | 1.64 (0.36)     | 1.36 (0.52)    | 1.30 (0.19)    | 1.32 (0.48)   | 1.59 (0.71)   | -               |
| <i>ATG12</i> (Autophagy)                       | p=0.692           | 1.01 (0.19)   | 1.20 (0.28)     | 1.11 (0.35)    | 1.07 (0.24)    | 1.14 (0.45)   | 1.43 (0.55)   | -               |
| Anatomical measures at termination             |                   |               |                 |                |                |               |               |                 |
| Body weight (g)                                | <b>p&lt;0.001</b> | 334 (8)       | 362 (42)        | 392 (52) *     | 343 (43)       | 333 (39)      | 315 (34)      | 401 (27) **     |
| Femur length (cm)                              | <b>p&lt;0.001</b> | 3.54 (0.05)   | 3.51 (0.12)     | 3.63 (0.13)    | 3.53 (0.10)    | 3.57 (0.13)   | 3.58 (0.10)   | 4.07 (0.03) *** |
| Absolute LV cardiomyocyte dimensions           |                   |               |                 |                |                |               |               |                 |
| Length (µm)                                    | p=0.325           | 90.8 (6.1)    | 88.6 (4.9)      | 89.9 (5.7)     | 86.8 (7.2)     | 89.6 (6.8)    | 84.1 (5.8)    | 87.2 (2.1)      |
| Width (µm)                                     | p=0.789           | 15.7 (2.4)    | 14.8 (1.8)      | 14.2 (2.5)     | 14.1 (1.3)     | 14.8 (2.3)    | 14.5 (1.4)    | 14.9 (1.5)      |
| CSA (µm <sup>2</sup> )                         | p=0.056           | 465 (131)     | 488 (160)       | 330 (36)       | 446 (136)      | 400 (82)      | 353 (69)      | 350 (63)        |
| Volume (µm <sup>3</sup> )                      | p=0.114           | 42302 (13033) | 43782 (15980)   | 30585 (1022)   | 38145 (13489)  | 34446 (6951)  | 29646 (5896)  | 30889 (4924)    |
| Standardized LV cardiomyocyte dimensions       |                   |               |                 |                |                |               |               |                 |
| Std length (µm/cm)                             | <b>p&lt;0.001</b> | 25.6 (2.0)    | 25.3 (2.0)      | 24.8 (1.5)     | 24.6 (1.9)     | 25.1 (2.5)    | 23.5 (1.8) *  | 21.5 (0.7) ***  |
| Std width (µm/cm)                              | p=0.192           | 4.42 (0.70)   | 4.21 (0.54)     | 3.91 (0.64)    | 3.98 (0.39)    | 4.13 (0.61)   | 4.05 (0.42)   | 3.67 (0.36)     |
| Std CSA (µm <sup>2</sup> /cm <sup>2</sup> )    | <b>p&lt;0.001</b> | 37.0 (10.5)   | 40.0 (14.4)     | 25.2 (3.2) *   | 35.2 (9.0)     | 31.0 (8.2)    | 27.6 (5.7)    | 21.3 (3.7) ***  |
| Std volume (µm <sup>3</sup> /cm <sup>3</sup> ) | <b>p&lt;0.001</b> | 953 (303)     | 1033 (432)      | 623 (73) *     | 845 (228)      | 748 (220)     | 649 (143) *   | 462 (69) ***    |

Values are means (SD). For RNA fold changes: all groups ( $n = 5$ ). For anatomical and histological measures: SHAM ( $n = 6$ ); 12 h: 12 hours T3-SCI ( $n = 8$ ); 1 d: 1 day T3-SCI ( $n = 6-7$ ); 3 d: 3 days T3-SCI ( $n = 8$  for all variables except CSA and volume measures,  $n = 5$ ); 5 d: 5 days T3-SCI ( $n = 7$  for all variables except CSA and volume measures,  $n = 5$ ); 7 d: 7 days T3-SCI ( $n = 8$ ); 8 w: 8 weeks T3-SCI ( $n = 8-9$ ). Group differences for linear regression (LR) with coefficient (group mean differences)  $p$ -values are shown as symbols (SHAM vs. T3-SCI timepoints): \* $p < 0.05$ , \*\* $p < 0.01$  and \*\*\* $p < 0.001$ . If data were non-parametric, a Box-Cox transformation was performed. *ATG7*, autophagy related 7; *ATG12*, autophagy related 12; *BECN1*, beclin 1; CSA, cross-sectional area; *MAFbx*, muscle atrophy F-box; *MuRF1*, muscle RING-finger protein 1; LV, left ventricle; Std, standardized to femur length; UPS, ubiquitin proteasome system. Bolded  $p$  values are significant,  $p < 0.05$ .

**Supplementary Table 4.** qPCR primer sequences for protein degradation targets

| Pathway      | Target       | Primer Sequence (forward and reverse) |
|--------------|--------------|---------------------------------------|
| UPS          | <i>MAFbx</i> | 5'-ACTTCTCAGAGCGGCAGATCC-3'           |
|              |              | 5'-CTCTGGGTTGTTGGCCGT-3'              |
|              | <i>MuRF1</i> | 5'-GCAGGAATGCTCCAGTCGG-3'             |
|              |              | 5'-GTGAGCCCCGAACACCTT-3'              |
| Autophagy    | <i>BECN1</i> | 5'-CGTCGGGGCCTAAAGAATG-3'             |
|              |              | 5'-GCTCTCTCCTGGTTTCGCC-3'             |
|              | <i>ATG12</i> | 5'-CCCAGAAACAGCCATCCCA-3'             |
|              |              | 5'-TCACATAAATAAACAACCTGCTCCGA-3'      |
|              | <i>ATG7</i>  | 5'-AGACCTTGAGCGTGCGTATG-3'            |
|              |              | 5'-AACTGCTACTCCATCTGTGGG-3'           |
| Housekeeping | <i>ACTB</i>  | 5'-GGGAAATCGTGCGTGACT-3'              |
|              |              | 5'-GCGGCAGTGGCCATCTC-3'               |

*ATG7*, autophagy related 7; *ATG12*, autophagy related 12; *ACTB*,  $\beta$ -actin; *BECN1*, beclin 1; *MAFbx*, muscle atrophy F-box; *MuRF1*, muscle RING-finger protein 1; UPS, ubiquitin proteasome system.

**Supplementary Table 5.** Effects of T3-SCI and combined T3-SCI with hexamethonium bromide, ganglionic blockader, on pressure-volume data in rodents

|                                             | RM-ANOVA          | CONDITION        |                 |                   |
|---------------------------------------------|-------------------|------------------|-----------------|-------------------|
|                                             |                   | Pre-intervention | Post-SCI        | Post-HEX          |
| <b>LV load-dependent systolic measures</b>  |                   |                  |                 |                   |
| $P_{\max}$ (mmHg)                           | <b>p&lt;0.001</b> | 113.5 (7.9)      | 70.1 (7.3) ***  | 58.0 (15.6) ***   |
| $P_{es}$ (mmHg)                             | <b>p&lt;0.001</b> | 91.2 (9.6)       | 54.0 (7.4) ***  | 51.0 (15.3) **    |
| $P_{dev}$ (mmHg)                            | <b>p&lt;0.001</b> | 115.8 (6.4)      | 72.6 (7.5) ***  | 59.1 (16.1) ***   |
| $dP/dt_{\max}$ (mmHg/s)                     | <b>p&lt;0.001</b> | 7313 (880)       | 3421 (858) ***  | 2094 (746) ***    |
| SW (mmHg.mL)                                | <b>p&lt;0.001</b> | 30.61 (13.04)    | 14.75 (6.87) ** | 13.00 (6.81) **   |
| $E_a$ (mmHg/ $\mu$ L)                       | p=0.099           | 0.34 (0.10)      | 0.28 (0.09)     | 0.22 (0.11)       |
| <b>LV load-dependent diastolic measures</b> |                   |                  |                 |                   |
| $P_{ed}$ (mmHg)                             | p=0.176           | 1.88 (2.71)      | -0.06 (1.60)    | 0.90 (1.56)       |
| $-dP/dt_{\min}$ (mmHg/s)                    | <b>p&lt;0.001</b> | -4767 (735)      | -2365 (586) *** | -1677 (950) *** † |
| tau (ms)                                    | <b>p=0.003</b>    | 64.7 (34.1)      | 72.1 (37.9)     | 170.3 (88.9) *    |
| <b>LV volumetric measures</b>               |                   |                  |                 |                   |
| EDV ( $\mu$ L)                              | <b>p=0.015</b>    | 274 (116)        | 258 (122)       | 403 (156)         |
| ESV ( $\mu$ L)                              | <b>p=0.005</b>    | 70.6 (39.4)      | 75.9 (46.5)     | 186.3 (95.3) *    |
| SV ( $\mu$ L)                               | p=0.110           | 297 (110)        | 215 (74)        | 260 (83)          |
| Q (mL/min)                                  | p=0.026           | 103.9 (53.2)     | 69.5 (36.1) *   | 69.4 (25.7)       |
| HR (bpm)                                    | <b>p&lt;0.001</b> | 335 (61)         | 307 (76)        | 262 (55) ***      |

Values are means (SD) with  $n = 7$ . Differences between conditions for one-way repeated-measures (RM)-ANOVA with paired t-test post-hoc (Bonferroni correction) are shown with symbols. Comparison vs. pre-intervention: \* $p < 0.05$ , \*\* $p < 0.01$  and \*\*\* $p < 0.001$ ; comparison vs. post-SCI: † $p < 0.05$ , †† $p < 0.01$  and ††† $p < 0.001$ .  $dP/dt_{\max}$ , maximal rate of systolic pressure increment;  $-dP/dt_{\min}$ , maximal rate of diastolic pressure decrement;  $E_a$ , arterial elastance; EDV, end-diastolic volume; ESV, end-systolic volume; HEX, hexamethonium bromide; HR, heart rate; LV, left ventricle;  $P_{dev}$ , developed pressure;  $P_{ed}$ , end-diastolic pressure;  $P_{es}$ , end-systolic pressure;  $P_{\max}$ , maximum pressure; Q, cardiac output; SV, stroke volume; SW, stroke work; tau, diastolic time constant. Bolded  $p$  values are significant,  $p < 0.05$ .

**Supplementary Table 6.** Effects of intact (L2-SCI) and reduced (T3-SCI) descending sympathetic control on pressure-volume data and hemodynamics in rodents

|                                              | ANOVA             | GROUP        |                 |                  |
|----------------------------------------------|-------------------|--------------|-----------------|------------------|
|                                              |                   | SHAM         | T3-SCI          | L2-SCI           |
| <b>LV load-dependent systolic measures</b>   |                   |              |                 |                  |
| P <sub>max</sub> (mmHg)                      | <b>p=0.002</b>    | 116.8 (14.7) | 82.7 (9.2) **   | 121.0 (10.0) ††  |
| P <sub>es</sub> (mmHg)                       | <b>p=0.002</b>    | 82.5 (9.3)   | 63.2 (9.0) *    | 90.5 (14.0) ††   |
| P <sub>dev</sub> (mmHg)                      | <b>p&lt;0.001</b> | 116.2 (14.1) | 81.1 (11.4) *** | 117.9 (6.3) †††  |
| dP/dt <sub>max</sub> (mmHg/s)                | <b>p&lt;0.001</b> | 11424 (1664) | 7015 (1538) **  | 13586 (2136) ††† |
| SW (mmHg.mL)                                 | <b>p&lt;0.001</b> | 22.30 (6.96) | 8.50 (2.69) **  | 22.47 (6.10) ††  |
| E <sub>a</sub> (mmHg/μL)                     | p=0.458           | 0.40 (0.15)  | 0.48 (0.12)     | 0.40 (0.08)      |
| <b>LV load-independent systolic measures</b> |                   |              |                 |                  |
| E <sub>es</sub> (mmHg/μL)                    | <b>p=0.042</b>    | 1.35 (0.24)  | 0.90 (0.26)     | 1.37 (0.46)      |
| E <sub>a</sub> /E <sub>es</sub>              | <b>p=0.015</b>    | 0.30 (0.11)  | 0.56 (0.15) **  | 0.32 (0.13) †    |
| PRSW (mmHg)                                  | <b>p=0.005</b>    | 130.0 (16.4) | 71.2 (30.5) **  | 104.8 (29.4)     |
| <b>LV load-dependent diastolic measures</b>  |                   |              |                 |                  |
| P <sub>ed</sub> (mmHg)                       | p=0.964           | 5.74 (1.87)  | 5.33 (1.91)     | 6.04 (2.57)      |
| -dP/dt <sub>min</sub> (mmHg/s)               | <b>p&lt;0.001</b> | -6463 (677)  | -4191 (953) **  | -7169 (1479) ††† |
| tau (ms)                                     | p=0.132           | 6.83 (1.00)  | 7.64 (1.89)     | 8.84 (1.99)      |
| <b>RC hemodynamic measures</b>               |                   |              |                 |                  |
| MAP (mmHg)                                   | <b>p&lt;0.001</b> | 90.0 (11.9)  | 51.7 (5.8) ***  | 87.4 (12.9) †††  |
| SBP (mmHg)                                   | <b>p=0.002</b>    | 113.4 (12.1) | 71.2 (7.5) **   | 115.9 (3.3) ††   |
| DBP (mmHg)                                   | <b>p&lt;0.001</b> | 75.2 (12.4)  | 42.7 (5.6) ***  | 70.1 (14.9) ††   |
| HR (bpm)                                     | p=0.779           | 388 (38)     | 347 (147)       | 384 (28)         |
| SVR (mmHg/mL)                                | p=0.919           | 0.97 (0.25)  | 0.94 (0.20)     | 1.00 (0.29)      |
| <b>LV volumetric measures</b>                |                   |              |                 |                  |
| EDV (μL)                                     | <b>p=0.015</b>    | 261 (77)     | 143 (17) *      | 251 (71) ††      |
| ESV (μL)                                     | p=0.055           | 49.9 (24.1)  | 20.3 (9.0)      | 32.6 (23.2)      |
| SV (μL)                                      | <b>p=0.005</b>    | 240 (68)     | 137 (25) **     | 235 (55) †       |
| Q (mL/min)                                   | <b>p&lt;0.001</b> | 96.5 (19.6)  | 56.3 (7.8) **   | 91.8 (18.9) ††   |

Values are means (SD). SHAM ( $n = 6-7$ ); T3-SCI ( $n = 6$ ); L2-SCI ( $n = 6-7$ ). Group differences for one-way ANOVA with Tukey HSD post-hoc (or Kruskal Wallis with Mann-Whitney U post-hoc tests, if non-parametric) are shown with symbols. Between-group comparison vs. SHAM: \* $p < 0.05$ , \*\* $p < 0.01$  and \*\*\* $p < 0.001$ ; between-group comparison vs. T3-SCI: † $p < 0.05$ , †† $p < 0.01$  and ††† $p < 0.001$ . DBP, diastolic blood pressure; dP/dt<sub>max</sub>, maximal rate of systolic pressure increment; -dP/dt<sub>min</sub>, maximal rate of diastolic pressure decrement; E<sub>a</sub>, arterial elastance; E<sub>a</sub>/E<sub>es</sub>, ventricular vascular coupling ratio; EDV, end-diastolic volume; E<sub>es</sub>, end-systolic elastance (end-systolic pressure-volume relationship); ESV, end-systolic volume; HR, heart rate; LV, left ventricle; MAP, mean arterial pressure; P<sub>dev</sub>, developed pressure; P<sub>ed</sub>, end-diastolic pressure; P<sub>es</sub>, end-systolic pressure; P<sub>max</sub>, maximum pressure; PRSW, preload recruitable stroke work; Q, cardiac output; RC, right-carotid; SBP, systolic blood pressure; SV, stroke volume; SVR, systemic vascular resistance; SW, stroke work; tau, diastolic time constant. Bolded  $p$  values are significant,  $p < 0.05$ .



**Supplementary Table 7.** Effects of minocycline on pressure-volume data and hemodynamics following severe T3 contusion in rodents

|                                              | TS T-TEST      | GROUP       |              |
|----------------------------------------------|----------------|-------------|--------------|
|                                              |                | Vehicle     | Minocycline  |
| <b>LV load-dependent systolic measures</b>   |                |             |              |
| Pmax (mmHg)                                  | <b>p=0.009</b> | 95.8 (13.7) | 123.1 (13.2) |
| Pes (mmHg)                                   | <b>p=0.005</b> | 81.0 (13.5) | 109.8 (12.1) |
| Pdev (mmHg)                                  | p=0.073        | 86.5 (8.3)  | 97.0 (9.0)   |
| dP/dt <sub>max</sub> (mmHg/s)                | p=0.089        | 5470 (2120) | 8406 (2989)  |
| SW (mmHg.mL)                                 | p=0.662        | 7.58 (3.96) | 8.27 (3.92)  |
| Ea (mmHg/ $\mu$ L)                           | p=0.090        | 0.81 (0.27) | 1.25 (0.48)  |
| <b>LV load-independent systolic measures</b> |                |             |              |
| E <sub>es</sub> (mmHg/ $\mu$ L)              | <b>p=0.022</b> | 0.71 (0.33) | 1.38 (0.46)  |
| E <sub>a</sub> /E <sub>es</sub>              | p=0.931        | 1.32 (0.63) | 1.79 (1.95)  |
| PRSW (mmHg)                                  | p=0.301        | 69.8 (23.7) | 89.8 (36.6)  |
| <b>LV load-dependent diastolic measures</b>  |                |             |              |
| P <sub>ed</sub> (mmHg)                       | <b>p=0.023</b> | 13.3 (9.5)  | 26.1 (4.5)   |
| -dP/dt <sub>min</sub> (mmHg/s)               | <b>p=0.001</b> | -4692 (680) | -6938 (972)  |
| tau (ms)                                     | p=0.247        | 15.3 (7.7)  | 21.0 (6.0)   |
| <b>RC hemodynamic measures</b>               |                |             |              |
| MAP (mmHg)                                   | p=0.185        | 81.4 (8.8)  | 88.3 (6.7)   |
| SBP (mmHg)                                   | p=0.487        | 101.3 (8.7) | 104.7 (6.3)  |
| DBP (mmHg)                                   | p=0.105        | 71.4 (8.9)  | 80.3 (7.0)   |
| HR (bpm)                                     | p=0.910        | 325 (63)    | 320 (61)     |
| SVR (mmHg/mL)                                | p=0.956        | 3.07 (1.29) | 3.11 (1.19)  |
| <b>LV volumetric measures</b>                |                |             |              |
| EDV ( $\mu$ L)                               | p=0.488        | 149 (42)    | 175 (75)     |
| ESV ( $\mu$ L)                               | p=0.425        | 66.9 (23.7) | 85.7 (49.0)  |
| SV ( $\mu$ L)                                | p=0.666        | 110 (42)    | 99 (38)      |
| Q (mL/min)                                   | p=0.931        | 31.1 (15.0) | 33.0 (15.7)  |
| <b>Histology - RVLM neuronal counts</b>      |                |             |              |
| DBH+ neurons                                 | -              | 389 (72)    | 319 (144)    |
| FG+ neurons                                  | -              | 129 (210)   | 368 (235)    |
| DBH+/FG+/NeuN+ neurons                       | -              | 30 (52)     | 63 (39)      |

Values are means (SD). Catheter-derived measures: Vehicle ( $n = 6$ ); Minocycline ( $n = 5$ ). Histological counts: all groups ( $n = 4$ ). Group differences were analyzed using a two-sample (TS) t-test (or Mann-Whitney U test, if non-parametric). DBH, dopamine beta-hydroxylase; DBP, diastolic blood pressure; dP/dt<sub>max</sub>, maximal rate of systolic pressure increment; -dP/dt<sub>min</sub>, maximal rate of diastolic pressure decrement; Ea, arterial elastance; E<sub>a</sub>/E<sub>es</sub>, ventricular vascular coupling ratio; EDV, end-diastolic volume; E<sub>es</sub>, end-systolic elastance (end-systolic pressure-volume relationship); ESV, end-systolic volume; FG, FluoroGold; HR, heart rate; LV, left ventricle; MAP, mean arterial pressure; NeuN, neuronal nuclei; P<sub>dev</sub>, developed pressure; P<sub>ed</sub>, end-diastolic pressure; P<sub>es</sub>, end-systolic pressure;

$P_{\max}$ , maximum pressure; PRSW, preload recruitable stroke work; Q, cardiac output; RC, right-carotid; RVLM, rostral ventrolateral medulla; SBP, systolic blood pressure; SV, stroke volume; SVR, systemic vascular resistance; SW, stroke work; tau, diastolic time constant; +, positive. Bolded  $p$  values are significant,  $p < 0.05$ .

**Supplementary Table 8.** Effects of penile vibrostimulation on hemodynamics, heart rate and systolic function measures in men with cervical SCI

|                                      | TS t-test         | CONDITION        |              |
|--------------------------------------|-------------------|------------------|--------------|
|                                      |                   | Pre-intervention | PVS          |
| Hemodynamics and heart rate measures |                   |                  |              |
| MAP (mmHg)                           | <b>p&lt;0.001</b> | 67.5 (7.0)       | 97.4 (11.0)  |
| SBP (mmHg)                           | <b>p&lt;0.001</b> | 93.2 (12.5)      | 143.7 (24.3) |
| DBP (mmHg)                           | <b>p&lt;0.001</b> | 54.7 (5.70)      | 74.3 (6.98)  |
| HR (bpm)                             | <b>p=0.003</b>    | 69.4 (11.8)      | 55.8 (7.8)   |
| Systolic function measures           |                   |                  |              |
| SV (mL)                              | <b>p=0.005</b>    | 59.0 (13.4)      | 70.1 (13.7)  |
| Q (L/min)                            | p=0.346           | 3.99 (0.79)      | 3.78 (0.66)  |
| dP/dt <sub>max</sub> (mmHg/s)        | <b>p=0.001</b>    | 498 (167)        | 856 (256)    |

Values are means (SD) with a total of  $n = 10$  cervical SCI participants (AIS A,  $n = 5$ ; AIS B,  $n = 5$ ). Differences between pre-intervention and during penile vibrostimulation (PVS) were analyzed using a two-sample paired (TS) t-test. DBP, diastolic blood pressure; dP/dt<sub>max</sub>, maximal rate of systolic pressure increment; HR, heart rate; MAP, mean arterial pressure; Q, cardiac output; SBP, systolic blood pressure; SV, stroke volume. Bolded  $p$  values are significant,  $p < 0.05$ .
